# Supplementary material for: Rapid biodiversity assessment in lichen diversity surveys: implications for quality assurance
Source: Royal Society of Chemistry journal article supplement (doi:10.1039/b818173j), 2009-01-01
Supplement: b818173j.pdf [file b818173j.pdf]

**Appendix 1** Simplified sampling lists based on morphospecies and corresponding list of species.

| RBA-A                                     | RBA-B                                                           | Species                                                                                                                                                                                                                     |
|-------------------------------------------|-----------------------------------------------------------------|-----------------------------------------------------------------------------------------------------------------------------------------------------------------------------------------------------------------------------|
| Grey foliose with broad lobes             | Grey foliose with broad lobes and soralia                       | <i>Punctelia subrudecta</i><br><i>Parmelia sulcata</i><br><i>Parmotrema perlatum</i><br><i>Peltigera collina</i>                                                                                                            |
|                                           | Grey foliose with broad lobes and isidia                        | <i>Parmelina pastillifera</i><br><i>Parmelia saxatilis</i><br><i>Parmelia submontana</i><br><i>Parmelina tiliacea</i>                                                                                                       |
|                                           | Grey foliose with broad lobes and apothecia                     | <i>Lobaria amplissima</i><br><i>Parmelina quercina</i>                                                                                                                                                                      |
| Grey foliose with narrow lobes            | Grey foliose with narrow lobes, not pruinose and with soralia   | <i>Hyperphyscia adglutinata</i><br><i>Hypogymnia physodes</i><br><i>Phaeophyscia endophoenicea</i><br><i>Phaeophyscia hirsuta</i><br><i>Phaeophyscia orbicularis</i><br><i>Physcia adscendens</i><br><i>Physcia tenella</i> |
|                                           | Grey foliose with narrow pruinose lobes and soralia             | <i>Physconia distorta</i><br><i>Physconia grisea</i><br><i>Physconia servitii</i>                                                                                                                                           |
|                                           | Grey foliose with narrow lobes, not pruinose and with apothecia | <i>Physcia aipolia</i><br><i>Physcia leptalea</i><br><i>Physcia stellaris</i>                                                                                                                                               |
| Yellowish-green foliose with broad lobes  | Yellowish-green foliose with broad lobes                        | <i>Lobarina scrobiculata</i><br><i>Flavoparmelia caperata</i>                                                                                                                                                               |
| Yellowish-green foliose with narrow lobes | Yellowish-green foliose with narrow lobes                       | <i>Parmeliopsis ambigua</i>                                                                                                                                                                                                 |
| Yellow foliose with broad lobes           | Yellow foliose with broad lobes and apothecia                   | <i>Xanthoria parietina</i>                                                                                                                                                                                                  |
| Yellow foliose with narrow lobes          | Yellow foliose with narrow lobes and soralia                    | <i>Candelaria concolor</i><br><i>Vulpicida pinastri</i><br><i>Xanthoria fallax</i>                                                                                                                                          |
| Black foliose swollen when wet            | Black foliose swollen when wet, with isidia                     | <i>Collema furfuraceum</i><br><i>Collema nigrescens</i>                                                                                                                                                                     |
| Green foliose with broad lobes            | Green foliose with broad lobes and apothecia                    | <i>Pleurosticta acetabulum</i>                                                                                                                                                                                              |
| Green foliose with narrow lobes           | Green foliose with narrow lobes and soralia                     | <i>Normandina pulchella</i>                                                                                                                                                                                                 |
| Brown-greenish foliose with broad lobes   | Brown-greenish foliose with broad lobes and soralia/isidia      | <i>Lobaria pulmonaria</i>                                                                                                                                                                                                   |
|                                           | Brown-greenish foliose with broad lobes and apothecia           | <i>Melanelixia glabra</i>                                                                                                                                                                                                   |
| Brown-greenish foliose with narrow lobes  | Brown-greenish foliose with narrow lobes and isidia             | <i>Melanohalea exasperata</i><br><i>Melanelixia fuliginosa</i>                                                                                                                                                              |
|                                           | Brown-greenish foliose with narrow lobes and soralia            | <i>Melanelixia subaurifera</i>                                                                                                                                                                                              |
| Grey fruticose                            | Grey fruticose                                                  | <i>Anaptychia ciliaris</i><br><i>Pseudevernia furfuracea</i>                                                                                                                                                                |
| Yellowish-green fruticose                 | Yellowish green filamentose                                     | <i>Usnea hirta</i>                                                                                                                                                                                                          |
|                                           | Yellowish-green fruticose with white lower cortex               | <i>Evernia prunastri</i>                                                                                                                                                                                                    |
|                                           | Yellowish-green fruticose with apothecia                        | <i>Ramalina fraxinea</i>                                                                                                                                                                                                    |

| RBA-A                              | RBA-B                                                        | Species                                                                                                                                                                                                                                                                                                                                                     |
|------------------------------------|--------------------------------------------------------------|-------------------------------------------------------------------------------------------------------------------------------------------------------------------------------------------------------------------------------------------------------------------------------------------------------------------------------------------------------------|
| Yellow fruticose                   | Yellow fruticose                                             | <i>Letharia vulpina</i> *                                                                                                                                                                                                                                                                                                                                   |
| Darkish green-brown fruticose      | Darkish green-brown fruticose                                | <i>Bryoria implexa</i> *                                                                                                                                                                                                                                                                                                                                    |
| Crustose with soralia              | Crustose with soralia                                        | <i>Buellia griseovirens</i><br><i>Pertusaria amara</i><br><i>Phlyctis agelaea</i><br><i>Phlyctis argena</i><br><i>Schismatomma decolorans</i>                                                                                                                                                                                                               |
| Crustose with isidia               | Crustose with isidia                                         | <i>Pertusaria coccodes</i><br><i>Pertusaria flavida</i>                                                                                                                                                                                                                                                                                                     |
| Crustose with lecanorine apothecia | Crustose with lecanorine apothecia immersed in fertile warts | <i>Pertusaria leioplaca</i><br><i>Pertusaria pertusa</i><br><i>Pertusaria pustulata</i><br><i>Lecanora allophana</i><br><i>Lecanora pulicaris</i><br><i>Rinodina sophodes</i><br><i>Lecanora chlarotera</i><br><i>Lecanora intumescens</i><br><i>Lecanora strobilina</i><br><i>Lecanora carpinea</i><br><i>Lecanora hagenii</i>                             |
|                                    | Crustose with dark brown lecanorine apothecia                |                                                                                                                                                                                                                                                                                                                                                             |
|                                    | Crustose with pinkish pale brown lecanorine apothecia        |                                                                                                                                                                                                                                                                                                                                                             |
|                                    | Crustose with pruinose lecanorine apothecia                  |                                                                                                                                                                                                                                                                                                                                                             |
| Crustose with lecideine apothecia  | Crustose with black lecideine apothecia                      | <i>Amandinea punctata</i><br><i>Arthonia punctiformis</i><br><i>Calicium salicinum</i><br><i>Lecidella elaeochroma</i>                                                                                                                                                                                                                                      |
|                                    | Crustose with yellow or red lecideine apothecia              | <i>Bacidia rubella</i><br><i>Caloplaca cerina</i><br><i>Caloplaca cerinella</i><br><i>Caloplaca ferruginea</i><br><i>Caloplaca herbidella</i><br><i>Caloplaca pyracea</i><br><i>Gyalecta truncigena</i><br><i>Arthonia radiata</i><br><i>Arthonia cinnabarina</i><br><i>Opegrapha varia</i><br><i>Naetrocymbe punctiformis</i><br><i>Pyrenula nitidella</i> |
|                                    | Crustose with long and narrow lecideine apothecia            |                                                                                                                                                                                                                                                                                                                                                             |
|                                    | Crustose with flask-like lecideine apothecia                 |                                                                                                                                                                                                                                                                                                                                                             |
| Green or grey squamulose           | Green or grey squamulose                                     | <i>Cladonia coniocraea</i><br><i>Cladonia fimbriata</i><br><i>Degelia plumbea</i>                                                                                                                                                                                                                                                                           |
| Brownish squamulose                | Brownish squamulose                                          | <i>Fuscopannaria sampaiana</i> *<br><i>Parmeliella testacea</i> *                                                                                                                                                                                                                                                                                           |
| Leprose                            | Grey leprose                                                 | <i>Lepraria incana</i><br><i>Lepraria sp.</i><br><i>Leproloma membranaceum</i>                                                                                                                                                                                                                                                                              |
|                                    | Yellow leprose                                               | <i>Candelariella xanthostigma</i>                                                                                                                                                                                                                                                                                                                           |
| Species not found in this survey   |                                                              |                                                                                                                                                                                                                                                                                                                                                             |

**Appendix 2** Glossary of the main lichenological terms used in the text (modified from Purvis et al., <sup>19</sup>).

---

Apothecia (singular: apothecium): the fruiting bodies of discocarpous Ascomycetes in which the hymenium is fully exposed to the air like a cup.

Autoecology : The branch of ecology which deals with individual species and their reactions to environmental factors.

5 Cortex: outer layer of a thallus.

Crustose: crust-like lichen growth form.

Epilithic (of thallus): growing on a rock surface.

Epiphytic (of thallus): growing on the bark of higher plants or plant like organisms.

Foliose: leaf-like lichen growth form.

10 Fruticose: shrub-like lichen growth form.

Isidia (singular: isidium): structure for vegetative reproduction of the lichen. It is corticated and contains photobionts. It may be of different forms: cylindrical, clavate, coralloid, simple ecc. ecc.

Lobe: the marginal part of the thallus in foliose lichens.

Macrolichen: a lichen with a large thallus. Most commonly fruticose and foliose lichens are referred to as macrolichens.

15 MQO: Measurement Quality Objective.

Photobiont: photosintetic symbiont of a lichen.

Soralia (singular: soralium): well-delimited parts of thallus where soredia are produced breaking the upper cortex. They may be of different forms: maculiform, labriiform, linear ecc. Ecc. (Nimis & Martellos, 2004. Keys to the lichens of Italy. I. Terricolous species. Edizioni Goliardiche.)

20 Soredia (singular: soredium) bundles of hiphae entwining a few photobiont cells, which serve to the vegetative reproduction of the lichen.

Thallus: the vegetative body of a lichen.
